# Supplementary material for: Gas Sensors Based on Porous Ceramic Bodies of MSnO3 Perovskites (M = Ba, Ca, Zn): Formation and Sensing Properties towards Ethanol, Acetone, and Toluene Vapours
Source: MDPI journal article supplement (doi:10.3390/molecules27092889), 2022-04-30
Supplement: s1 [file s1]

## Supplementary information

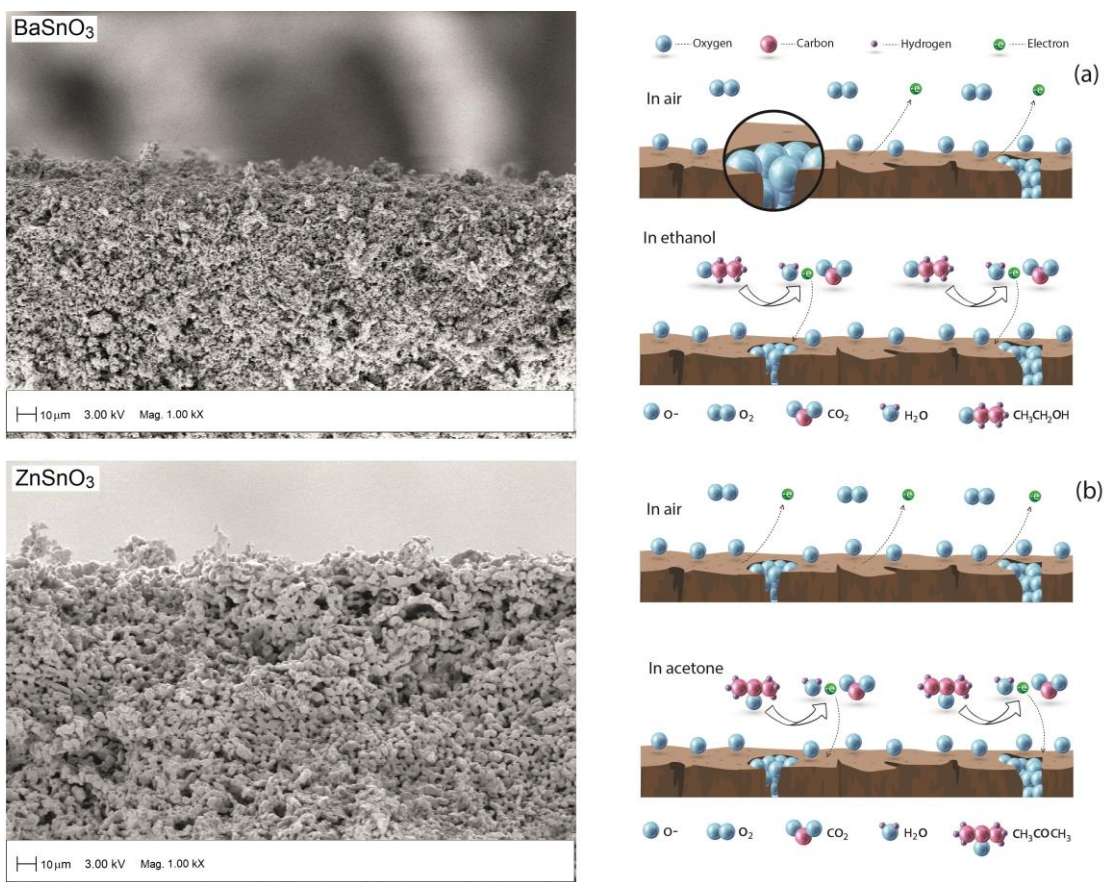

**Fig. S1.** Scanning electron microscopy images and illustration of the gas sensing mechanism of the (a) BaSnO<sub>3</sub> and (b) ZnSnO<sub>3</sub> sensors.

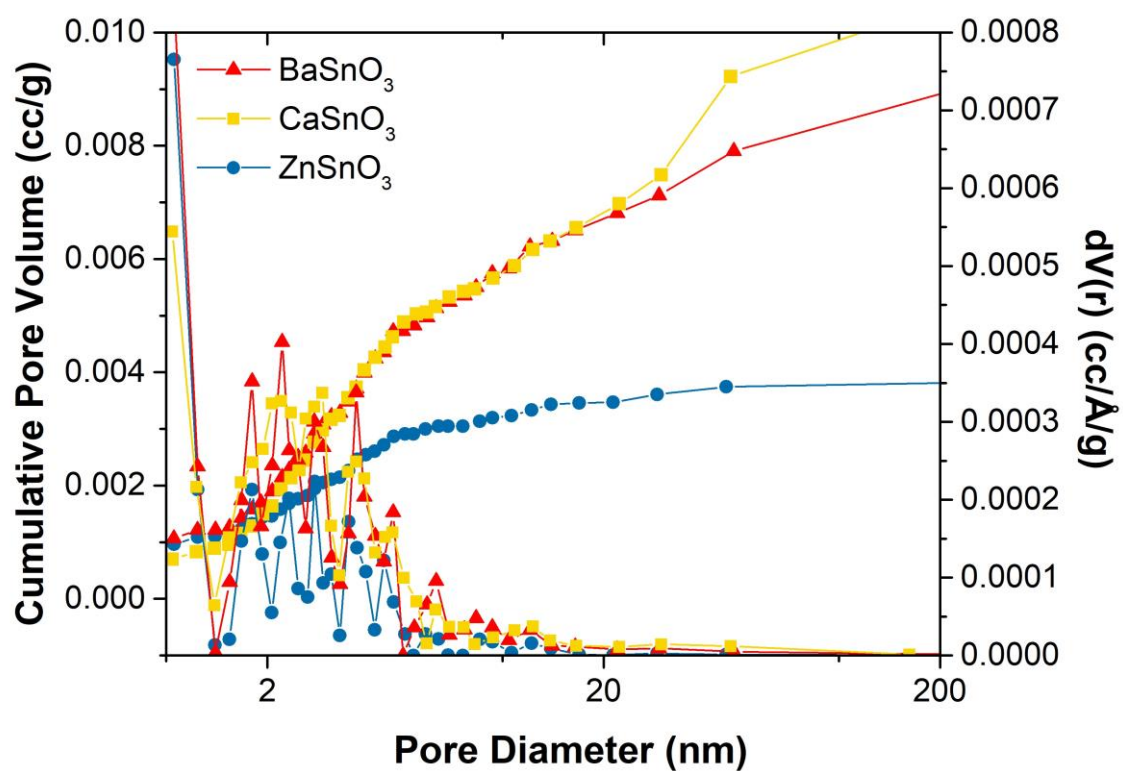

**Fig. S2.** Pore size distributions by nitrogen absorption-desorption obtained by Quantachrome Instruments modelo NOVA 1000e for the BaSnO<sub>3</sub>, ZnSnO<sub>3</sub>, and CaSnO<sub>3</sub> ceramic bodies.
